# Supplementary material for: Metataxonomic Analysis of Bacteria Entrapped in a Stalactite’s Core and Their Possible Environmental Origins
Source: MDPI journal article supplement (doi:10.3390/microorganisms9122411), 2021-11-23
Supplement: s1 [file s1]

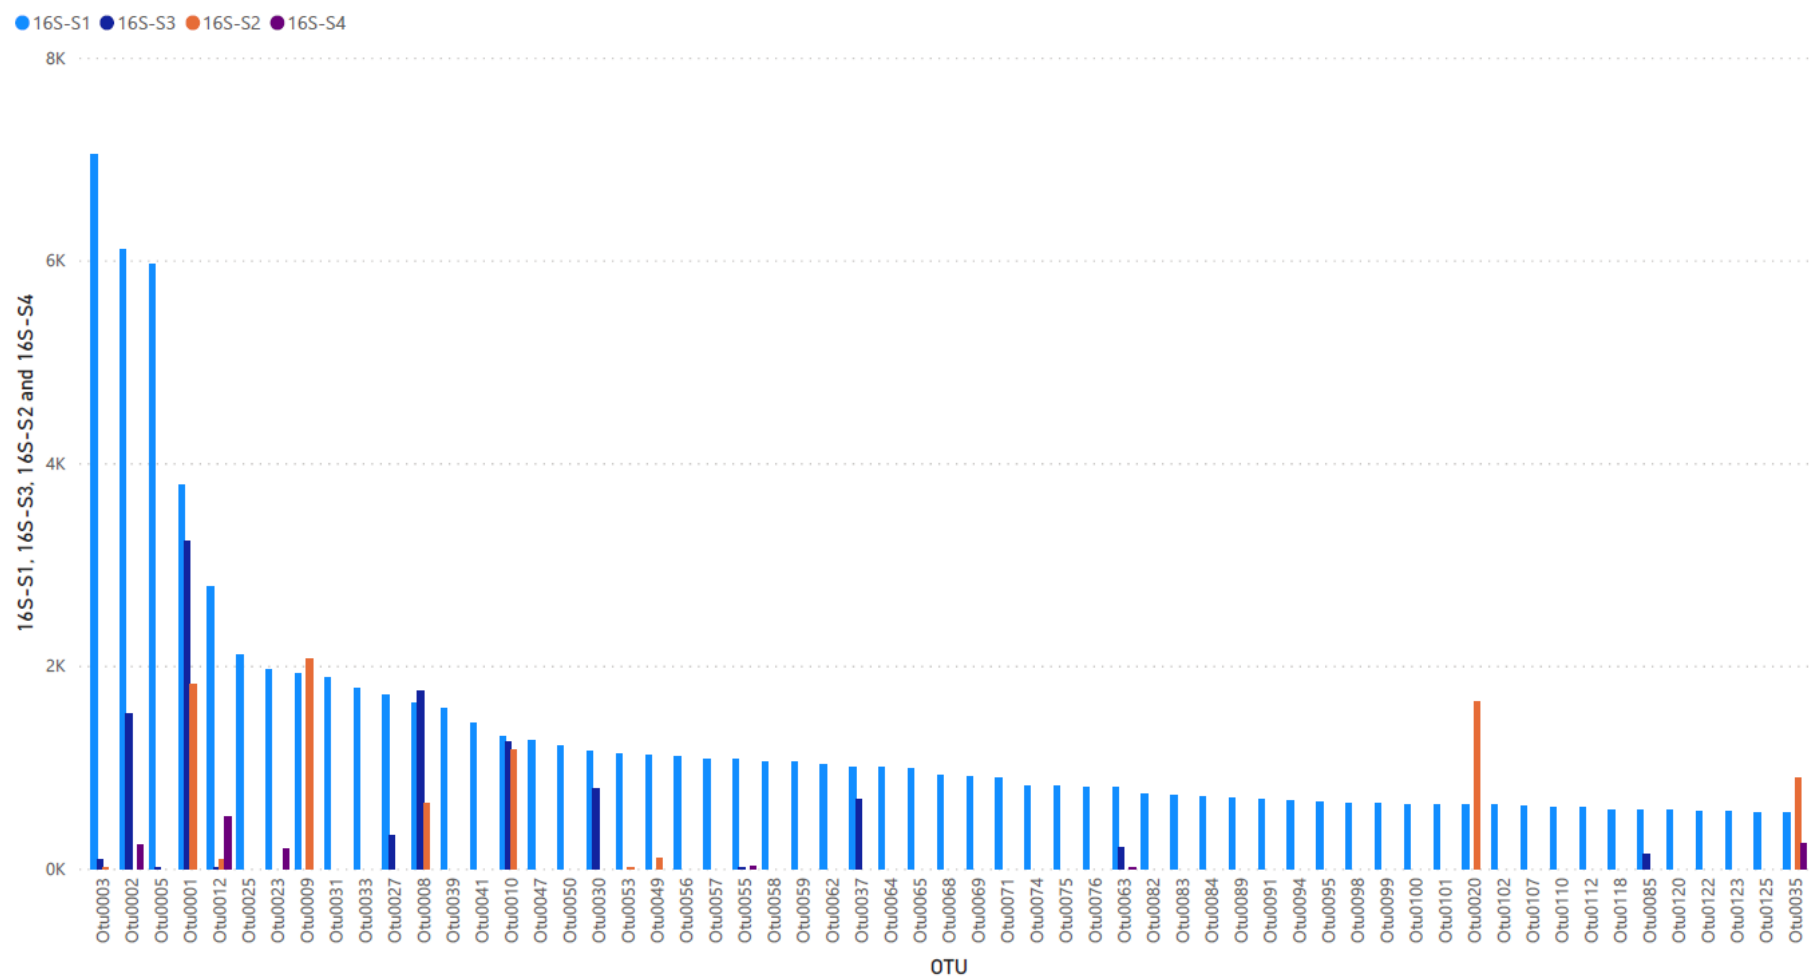

Figure S1. OTU

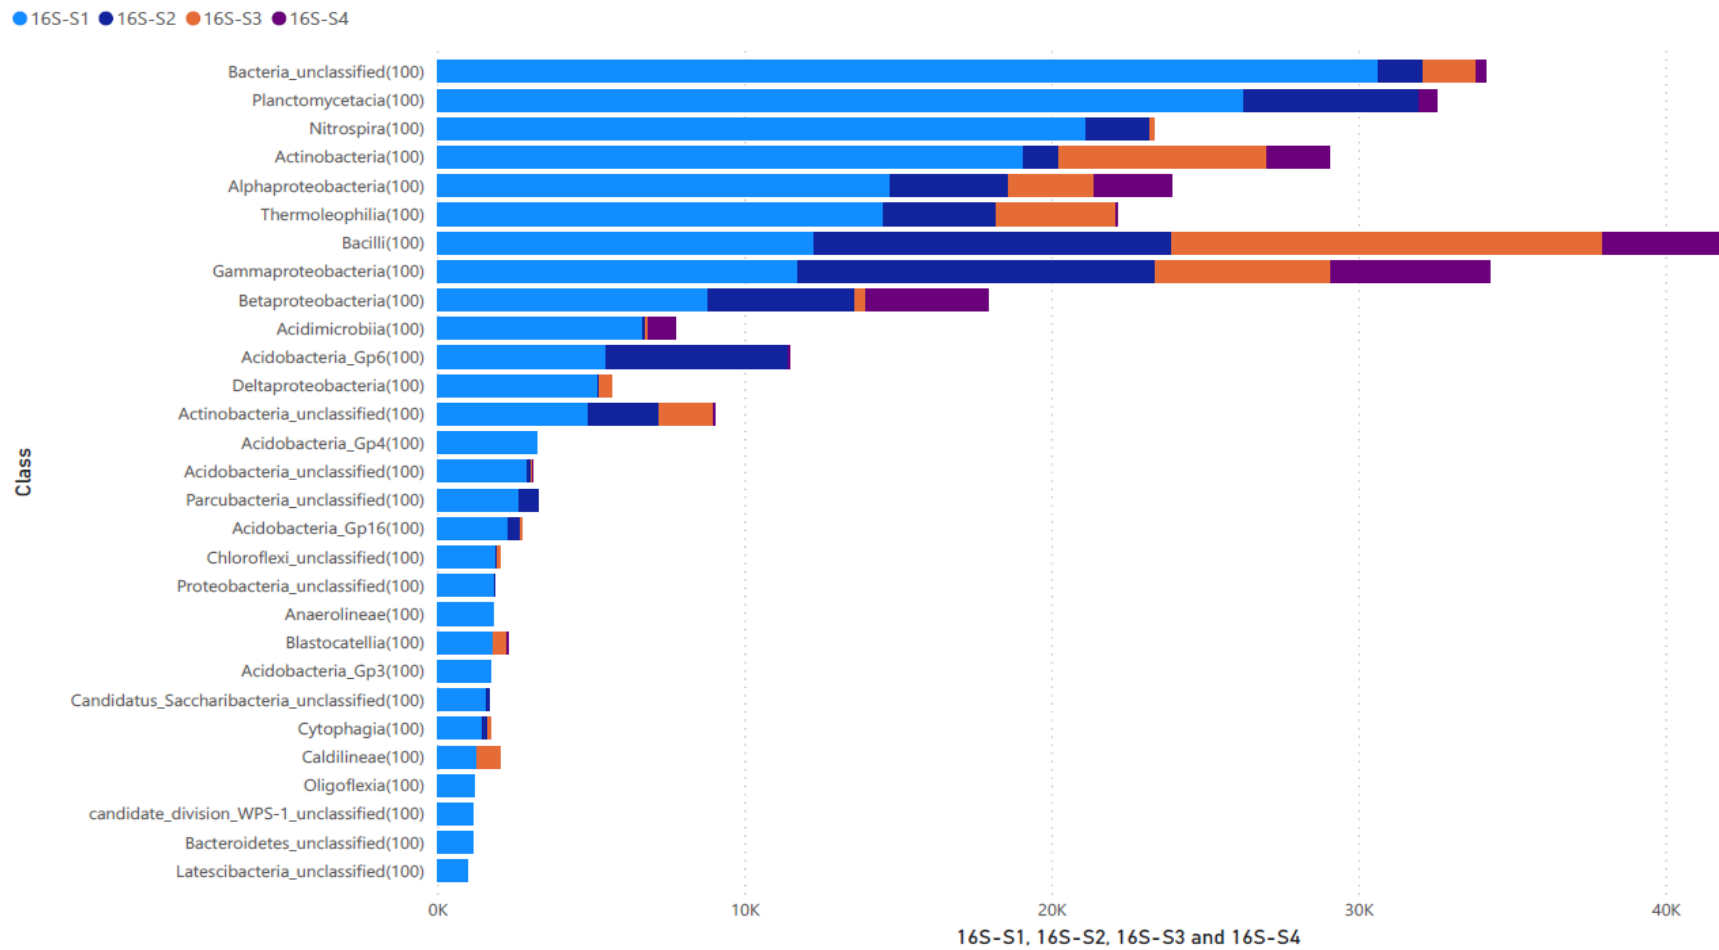

Figure S2. Class (16S-S1, 16S-S2, 16S-S3, 16S-S4)

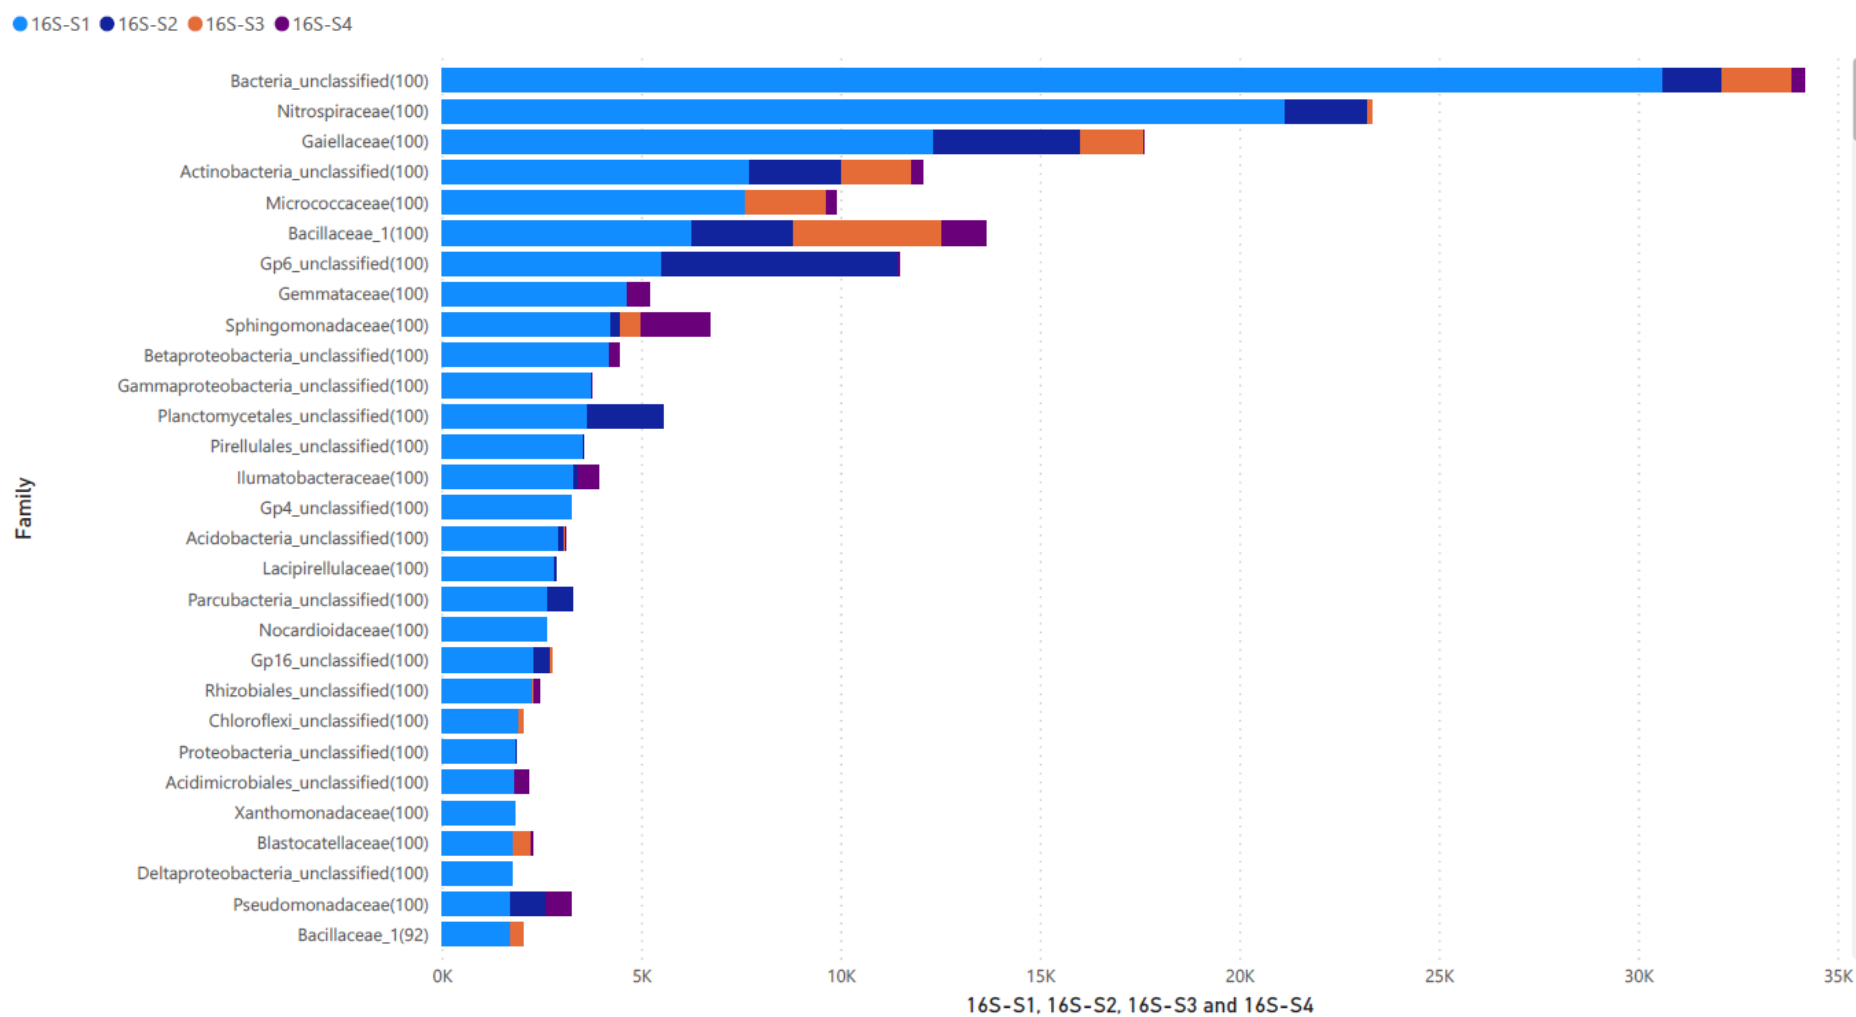

Figure S3. Family (16S-S1, 16S-S2, 16S-S3, 16S-S4)

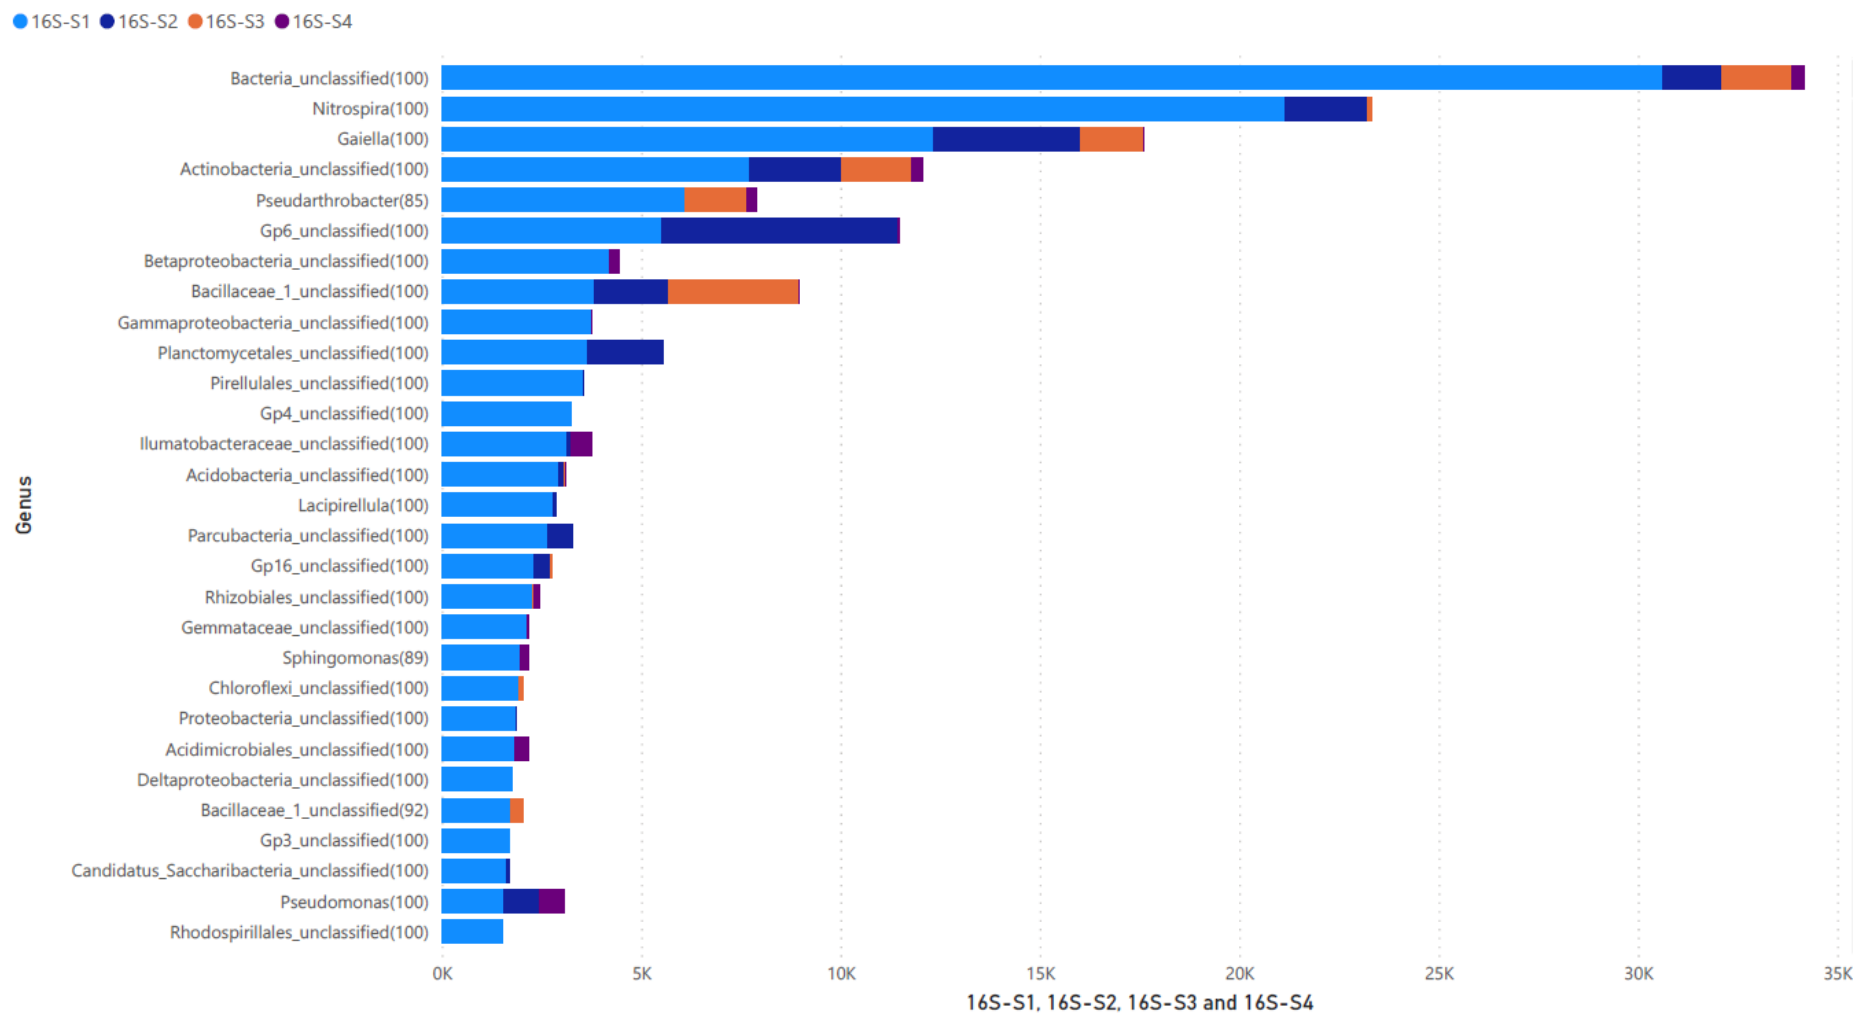

Figure S4. Genus (16S-S1, 16S-S2, 16S-S3, 16S-S4)

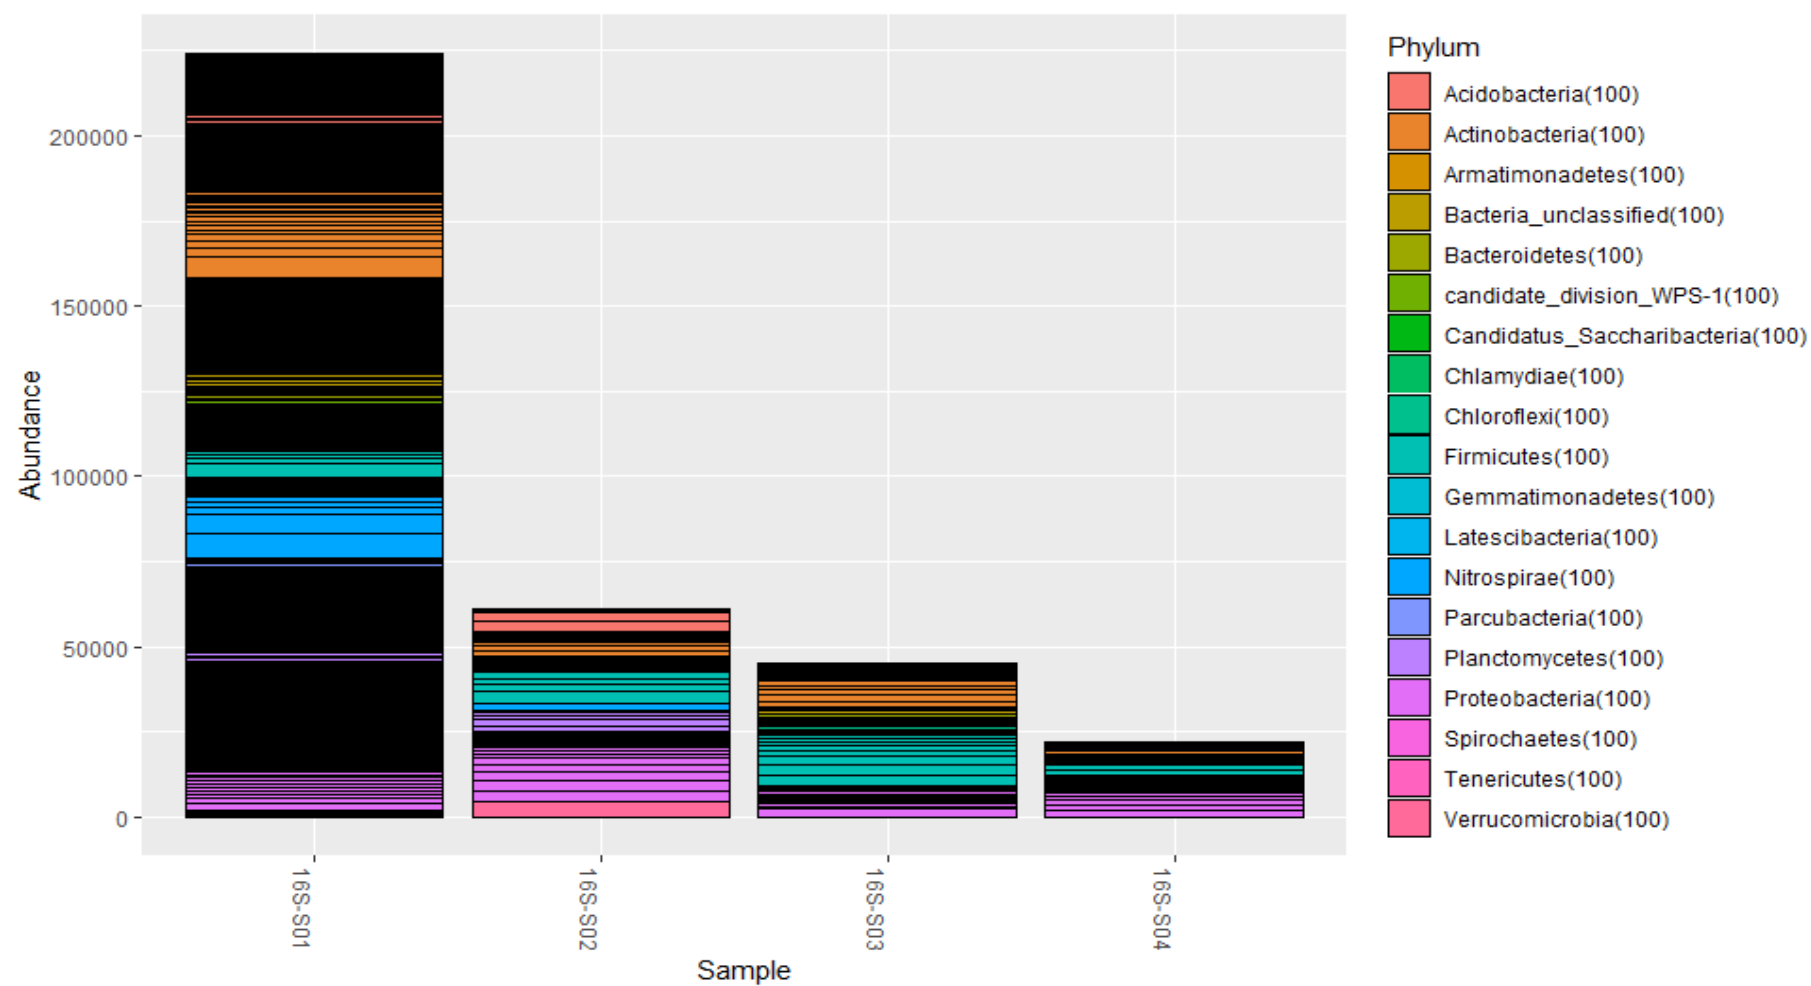

Figure S5. Sample (Abundance - Phylum)

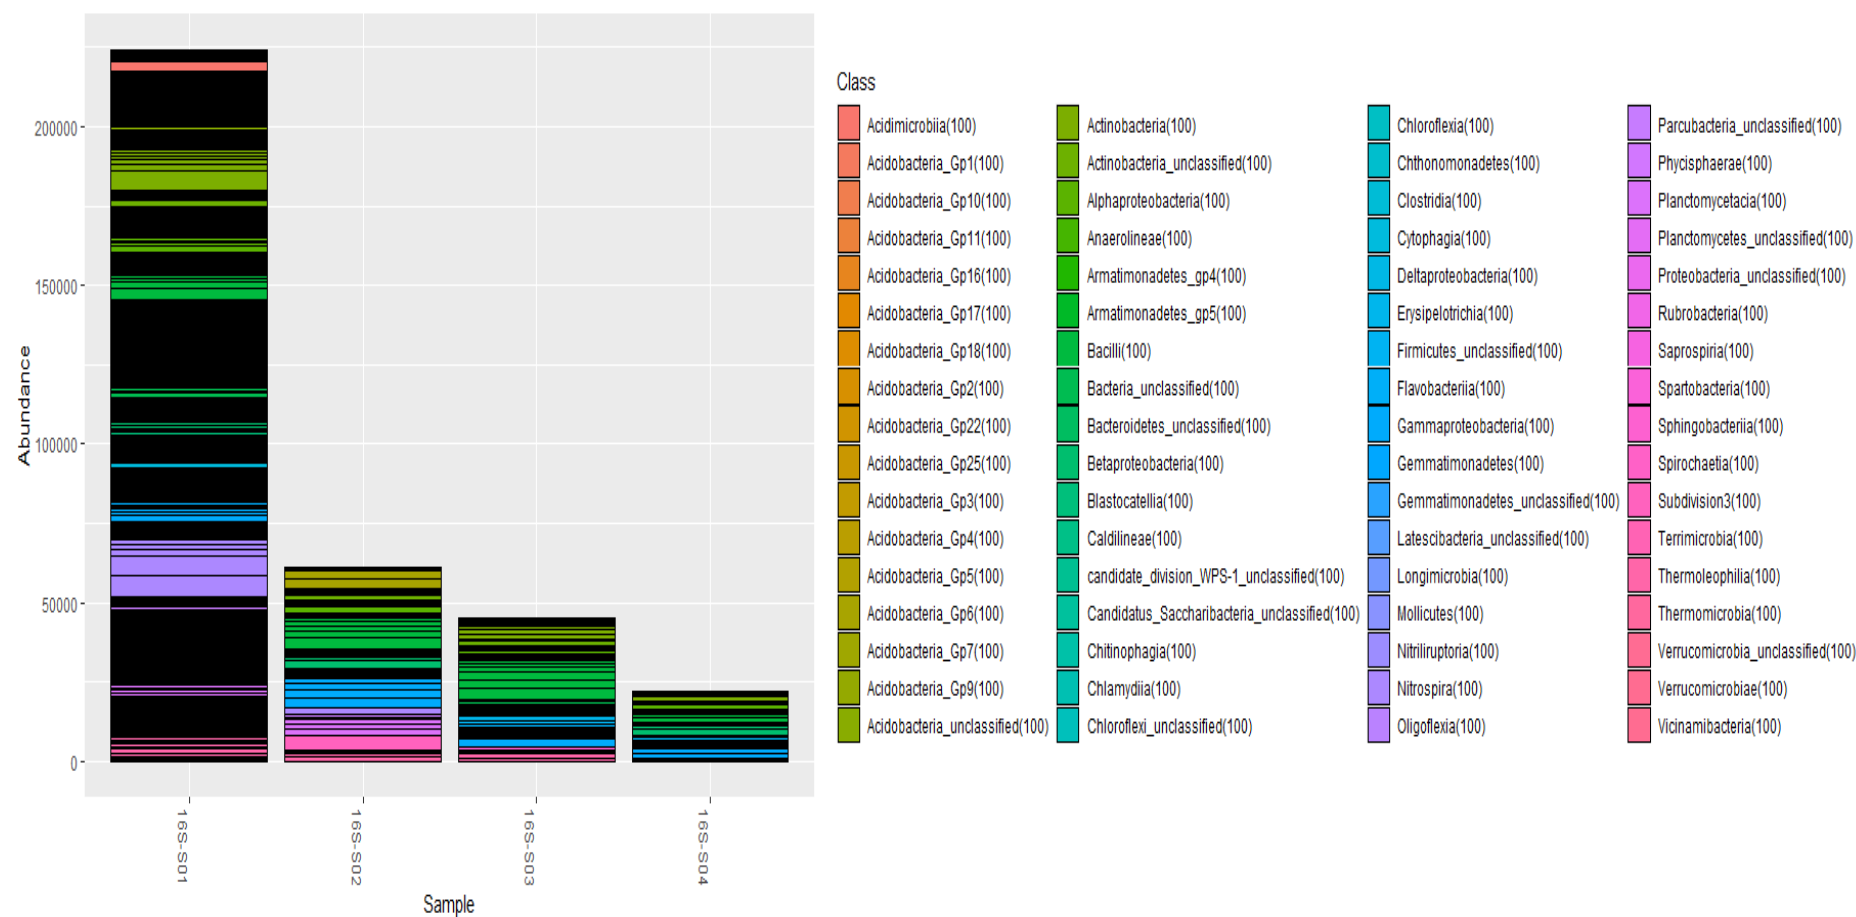

Figure S6. Sample (Abundance - Class)

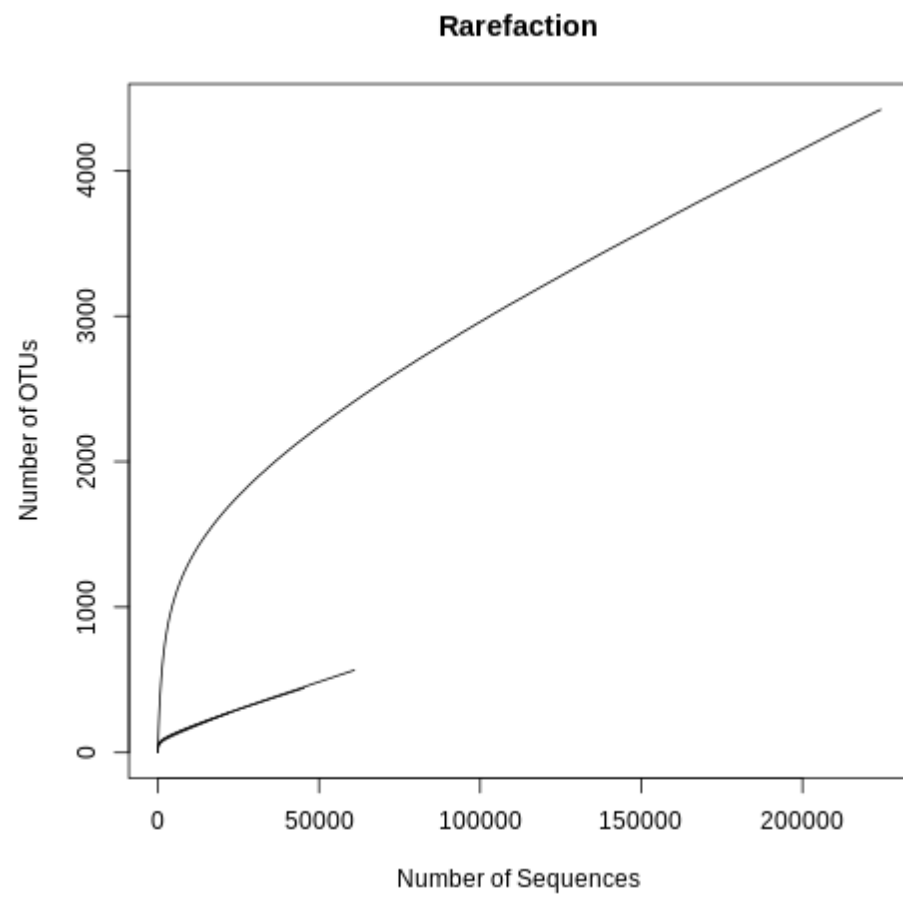

Figure S7. Alpha diversity

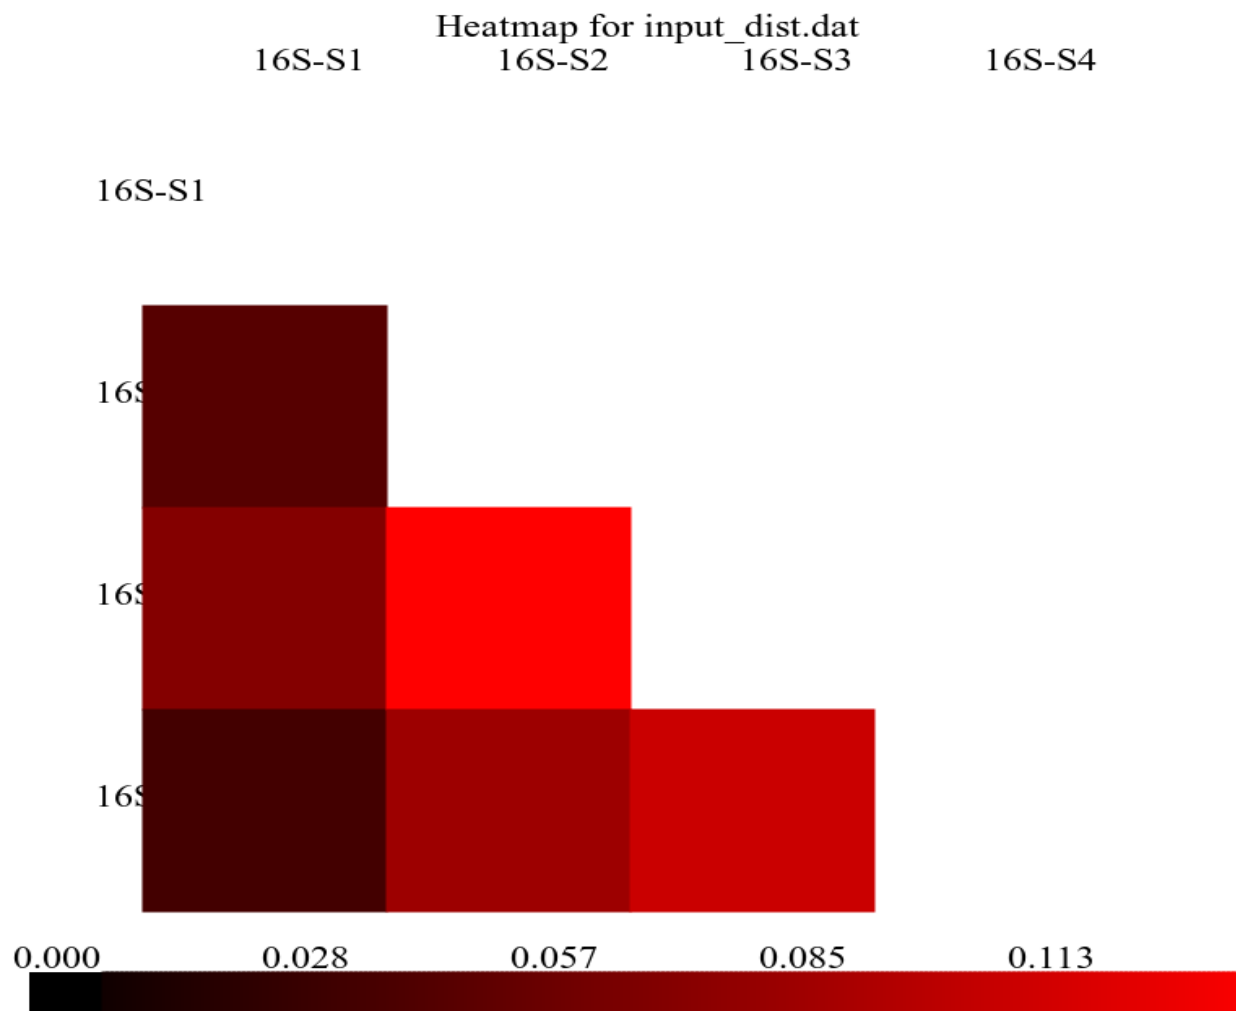

Figure S8. Bray-Curtis Heatmap



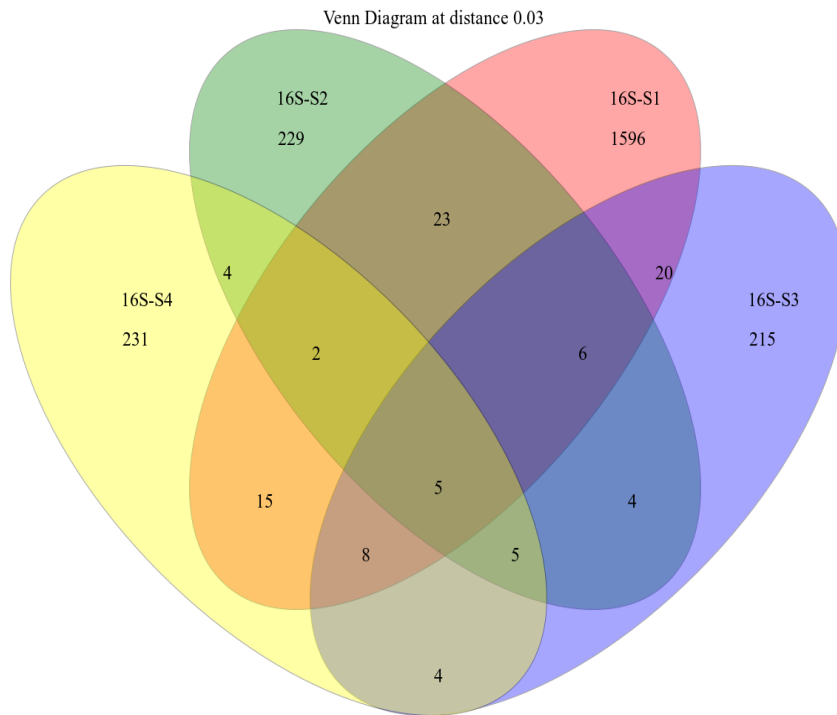

The number of species in group 16S-S1 is 1675  
 The number of species in group 16S-S2 is 278  
 The number of species in group 16S-S3 is 267  
 The number of species in group 16S-S4 is 274  
 The number of species shared between groups 16S-S1 and 16S-S2 is 36  
 The number of species shared between groups 16S-S1 and 16S-S3 is 39  
 The number of species shared between groups 16S-S1 and 16S-S4 is 30  
 The number of species shared between groups 16S-S2 and 16S-S3 is 20  
 The number of species shared between groups 16S-S2 and 16S-S4 is 16  
 The number of species shared between groups 16S-S3 and 16S-S4 is 22  
 The number of species shared between groups 16S-S1, 16S-S2 and 16S-S3 is 11  
 The number of species shared between groups 16S-S1, 16S-S2 and 16S-S4 is 7  
 The number of species shared between groups 16S-S1, 16S-S3 and 16S-S4 is 13  
 The number of species shared between groups 16S-S2, 16S-S3 and 16S-S4 is 10  
 The total richness of all the groups is 2367

Figure S9. Venn diagram

Total: 352637

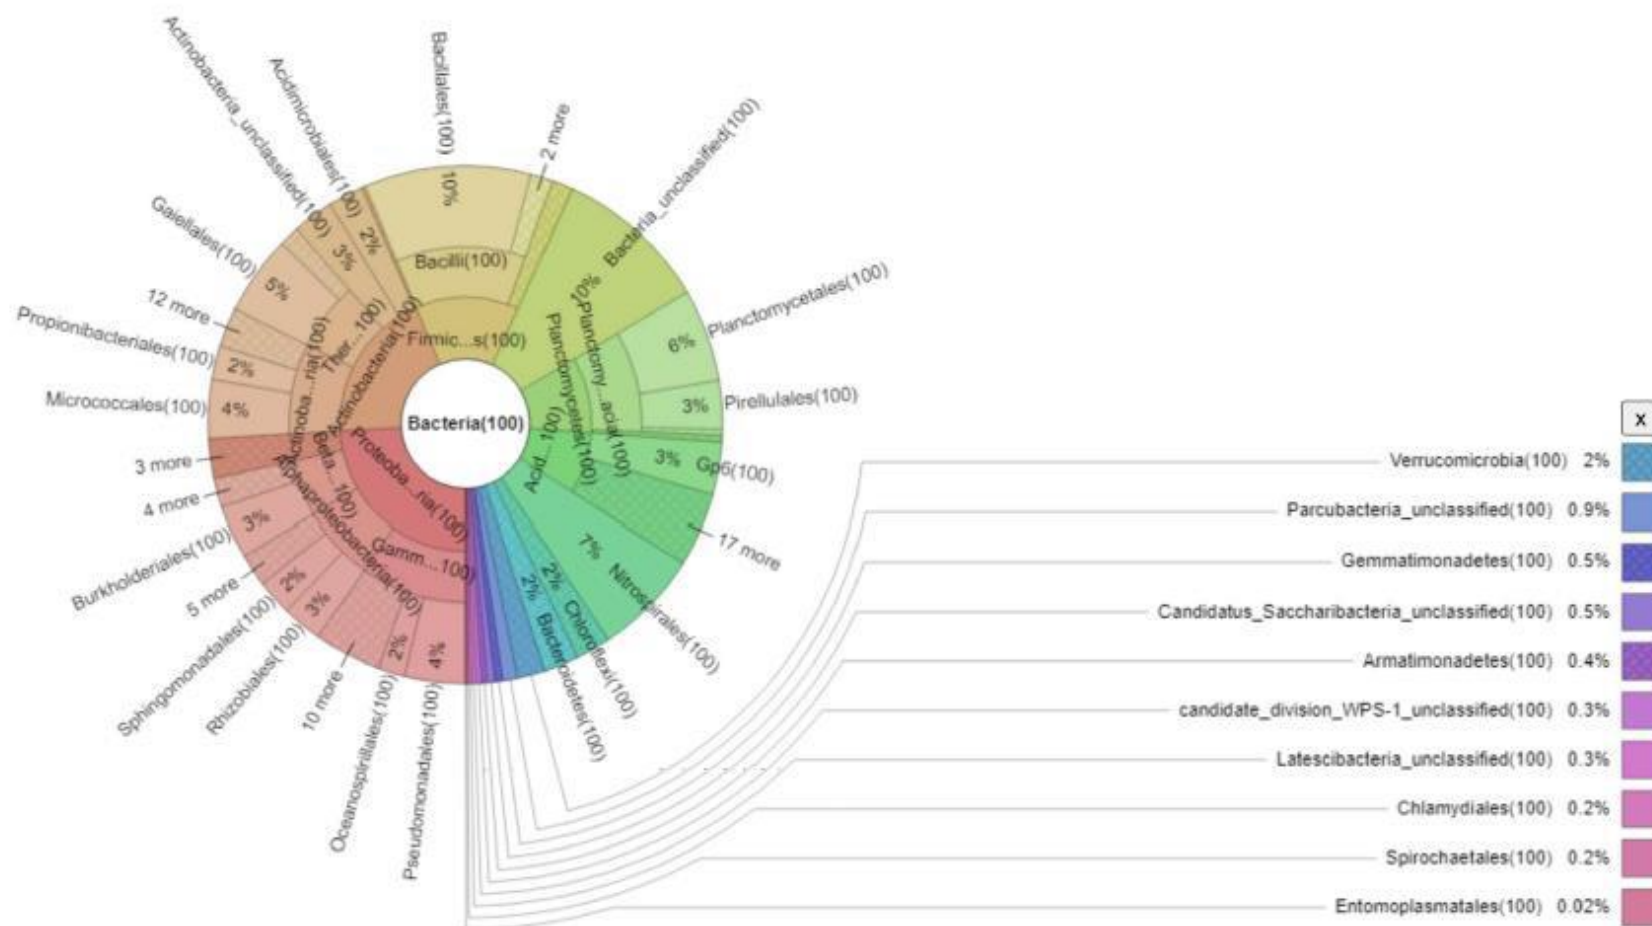

Figure S10. Krona pie chart
